# Supplementary material
Source: Research Square preprint supplement (doi:10.21203/rs.3.rs-9966610/v1)
Supplement: Supplementary file 1 [file 35e9789df3985a2984d60912.pdf]

## Supplemental Information

# Chole-seq: a modular single-cell multi-omics framework for chemical decoding of membrane cholesterol and transcriptomes

**Authors:** Wenqi Zhu<sup>1,3†</sup>, Xin Yang<sup>2†</sup>, Xiangyu Wu<sup>2,4†</sup>, Xuyang Hao<sup>2</sup>, Guoxin Tang<sup>3</sup>, Jiameng Sun<sup>3</sup>, Qi Xue<sup>1</sup>, Yang Yang<sup>1</sup>, Shiming Sun<sup>1</sup>, Nan Fang<sup>3</sup>, Rong Yang<sup>2</sup>, Zihan Zhao<sup>2\*</sup>, Jie P. Li<sup>1</sup>, Chaoyong Yang<sup>5</sup>, Tian Tian<sup>1\*</sup>

**Affiliations:** <sup>1</sup>State Key Laboratory of Coordination Chemistry, Chemistry and Biomedicine Innovation Center (ChemBIC), School of Chemistry, Nanjing University, Nanjing 210023, China.

<sup>2</sup>Department of Urology, Nanjing Drum Tower Hospital, Affiliated Hospital of Medical School, Nanjing University, Nanjing 210008, China

<sup>3</sup>Singleron Biotechnologies, Nanjing, Jiangsu, China

<sup>4</sup>Department of Urology, Zhongshan Hospital of Xiamen University, School of Medicine, Xiamen University

<sup>5</sup>State Key Laboratory of Physical Chemistry of Solid Surfaces, College of Chemistry and Chemical Engineering, Xiamen University, Xiamen 361005, China

21  
22  
23  
24  
25  
26  
27  
28

## ***Table of Contents***

Figure S1. Optimization and specificity validation of Chole-seq..... 3

Figure S2. Biocompatibility assessment of Chole-probe labeling by AO/PI staining to evaluate cell viability. .... 3

Figure S3. Characterization of membrane cholesterol heterogeneity in neutrophils..... 4

Figure S4. Functional validation of Chole<sup>High</sup>\_LacNAc<sup>High</sup> and Chole<sup>Low</sup>\_LacNAc<sup>Low</sup> tumor cells in the MB49 mouse lung metastasis model. .... 5

29 **Supplementary Figures**

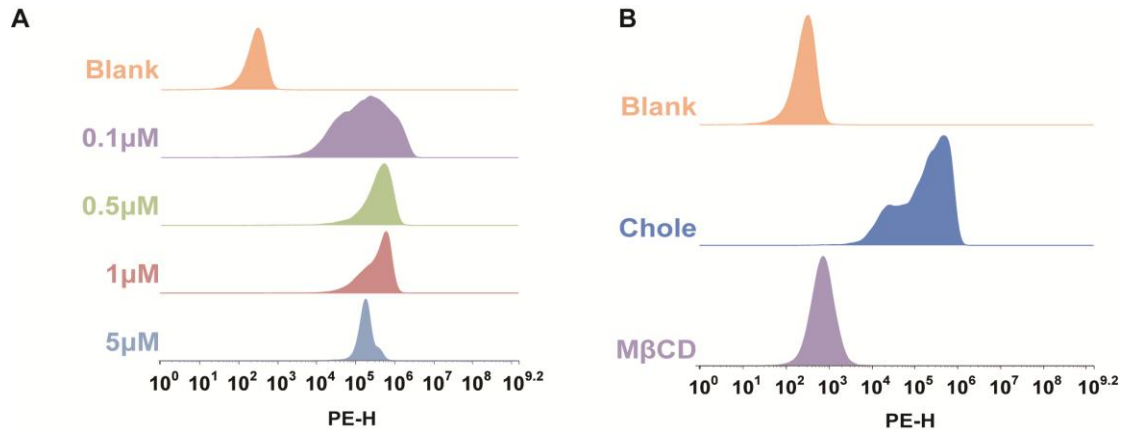

30

31 **Figure S1.** Optimization and specificity validation of Chole-seq. (A) Dose-dependent  
32 analysis of Chole-probe labeling in Jurkat cells at concentrations ranging from 0.1 to 5  
33 μM. (B) Specificity validation by cholesterol depletion with MβCD in Jurkat cells.

34

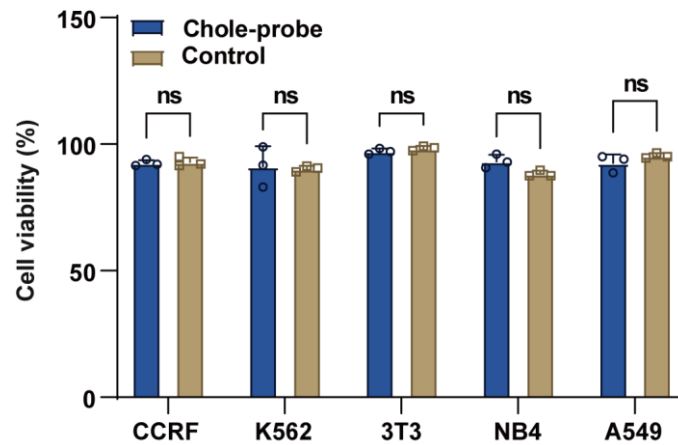

35

36 **Figure S2.** Biocompatibility assessment of Chole-probe labeling by AO/PI staining to  
37 evaluate cell viability (n = 3). Data are presented as mean ± SD. P values were  
38 determined by two-way ANOVA. ns,  $P > 0.05$ .

39

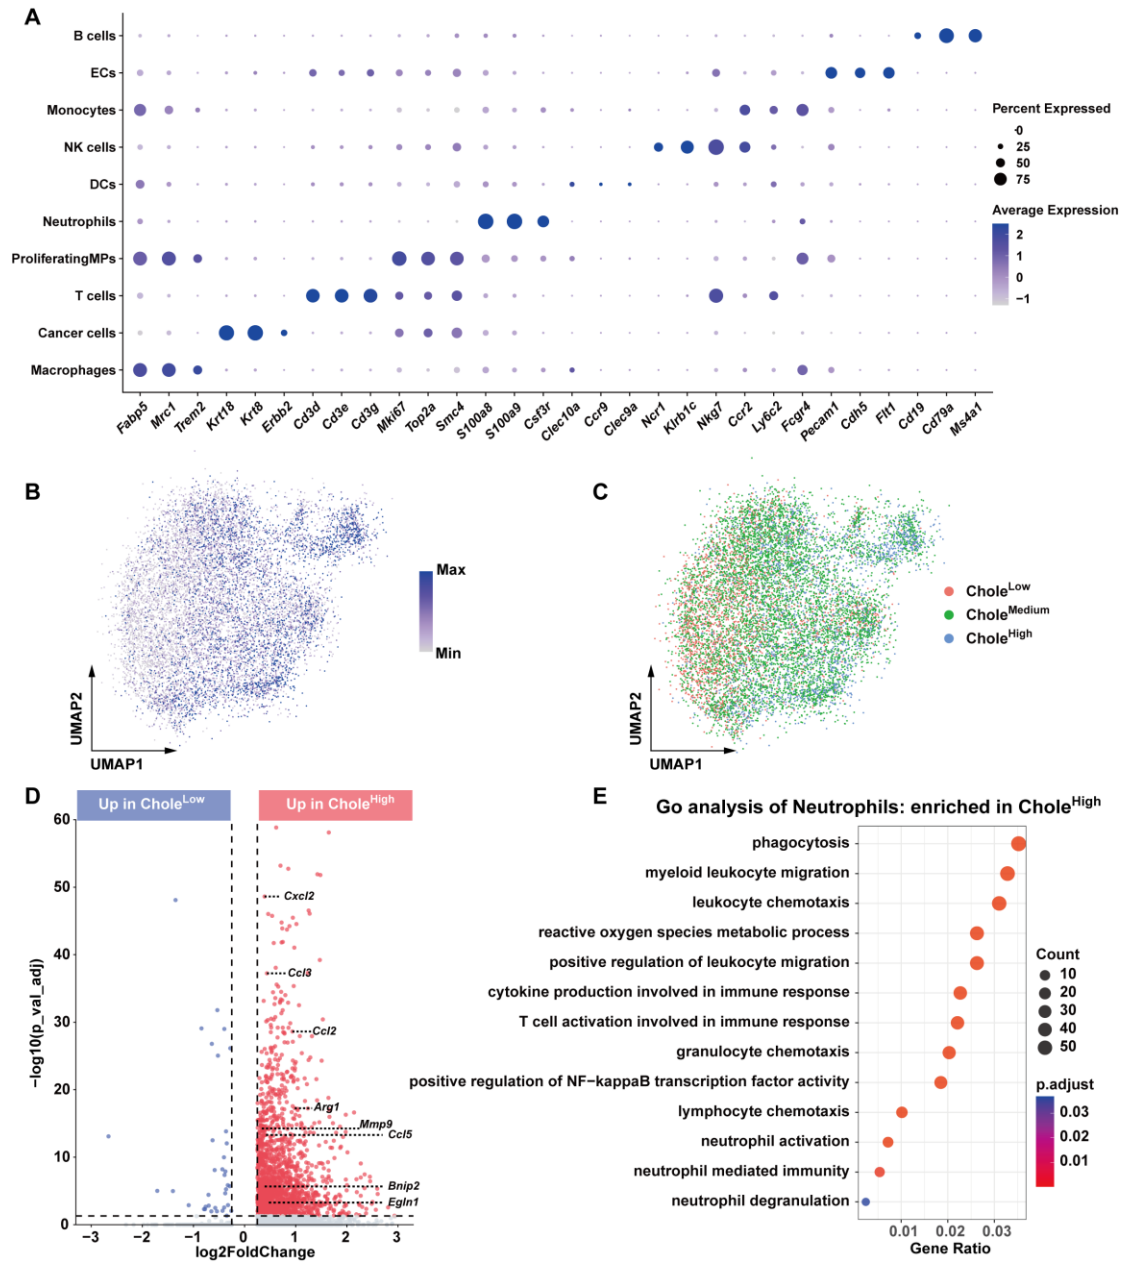

40

41 **Figure S3.** Characterization of membrane cholesterol heterogeneity in neutrophils. (A)  
 42 Canonical marker genes used for cell type identification in the MB49 mouse model. (B)  
 43 UMAP plots showing membrane cholesterol abundance in neutrophils based on  
 44 transcriptomic profiles. (C) Neutrophil subpopulations were classified into Chole<sup>High</sup>,  
 45 Chole<sup>Medium</sup>, and Chole<sup>Low</sup> groups according to cholesterol abundance. (D) Differential  
 46 gene expression analysis between the Chole<sup>High</sup> and Chole<sup>Low</sup> groups. (E) GO analysis  
 47 identifying enriched biological processes in the Chole<sup>High</sup> and Chole<sup>Low</sup> groups.

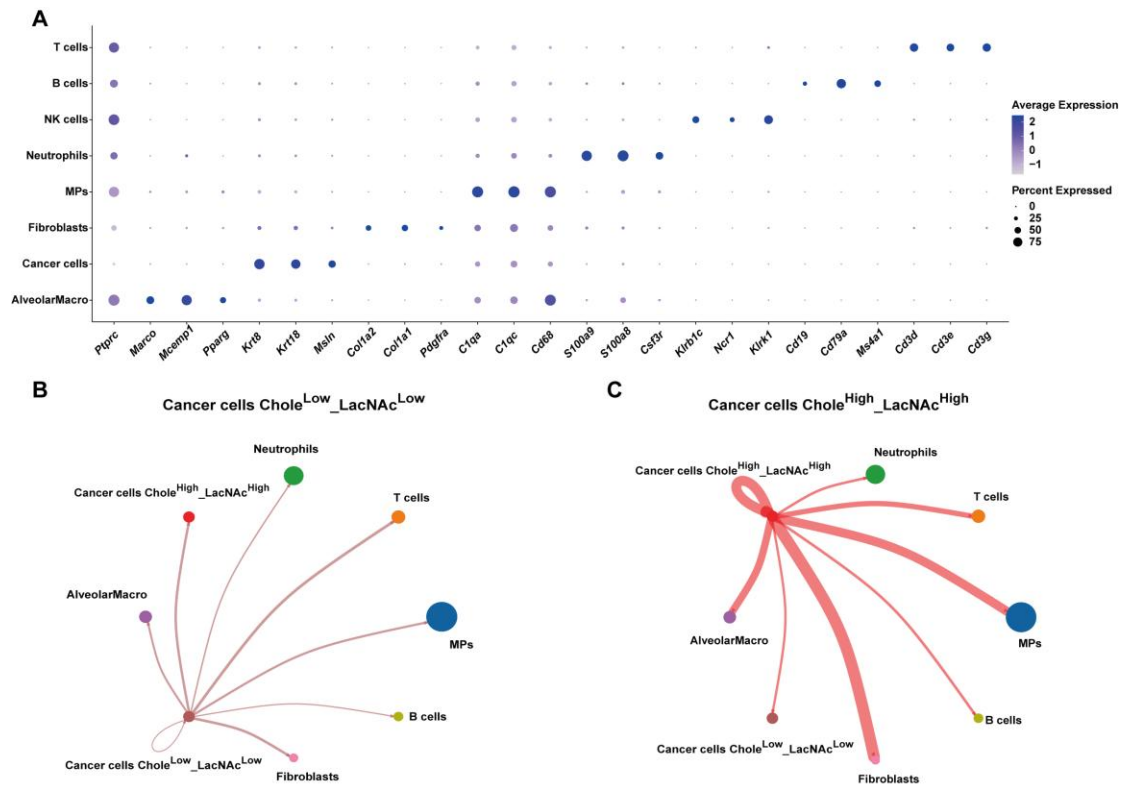

48

49 **Figure S4.** Functional validation of Chole<sup>High</sup>\_LacNAc<sup>High</sup> and Chole<sup>Low</sup>\_LacNAc<sup>Low</sup>  
 50 tumor cells in the MB49 mouse lung metastasis model. (A) Cell type annotation  
 51 markers. (B, C) Cell communication landscapes of Chole<sup>Low</sup>\_LacNAc<sup>Low</sup> cells and  
 52 Chole<sup>High</sup>\_LacNAc<sup>High</sup> cells.

53
